# Supplementary material for: Hybrid Multivalent Jack Bean α-Mannosidase Inhibitors: The First Example of Gold Nanoparticles Decorated with Deoxynojirimycin Inhitopes
Source: MDPI journal article supplement (doi:10.3390/molecules26195864), 2021-09-27
Supplement: s1 [file s1]

# Hybrid Multivalent Jack Bean $\alpha$ -Mannosidase Inhibitors: The First Example of Gold Nanoparticles Decorated with Deoxynojirimycin Inhitopes

Costanza Vanni <sup>1</sup>, Anne Bodlenner <sup>2,\*</sup>, Marco Marradi <sup>1</sup>, J  r  my P. Schneider <sup>2</sup>, Maria de los Angeles Ramirez <sup>3</sup>, Sergio Moya <sup>3</sup>, Andrea Goti <sup>1,4</sup>, Francesca Cardona <sup>1,4</sup>, Philippe Compain <sup>2</sup> and Camilla Matassini <sup>1,4,\*</sup>

<sup>1</sup> Dipartimento di Chimica "Ugo Schiff", Universit   di Firenze, Via della Lastruccia 3-13, 50019 Sesto Fiorentino, Italy; costanza.vanni@unifi.it (C.V.); marco.marradi@unifi.it (M.M.); andrea.goti@unifi.it (A.G.); francesca.cardona@unifi.it (F.C.)

<sup>2</sup> Laboratoire d'Innovation Mol  culaire et Applications (LIMA), University of Strasbourg, University of Haute-Alsace, CNRS (UMR 7042), Equipe de Synth  se Organique et Mol  cules Bioactives (SYBIO), ECPM, 25 Rue Becquerel, 67000 Strasbourg, France; jeremy.schneider@live.fr (J.P.S.); philippe.compain@unistra.fr (P.C.)

<sup>3</sup> Soft Matter Nanotechnology Lab, CIC biomaGUNE, Basque Research and Technology Alliance (BRTA), Paseo Miram  n 182, 20014 Donostia-San Sebasti  n, Gipuzkoa, Spain; aangie.ramirez@gmail.com (M.d.l.A.R.); smoya@cicbiomagune.es (S.M.)

<sup>4</sup> Associated with LENS, Via N. Carrara 1, 50019 Sesto Fiorentino, Italy

\* Correspondence: annebod@unistra.fr (A.B.); camilla.matassini@unifi.it (C.M.); Tel.: +33-36-8852684 (A.B.); +39-055-457-3536 (C.M.)

# Supplementary Materials

## Table of contents

|                                                                                            |     |
|--------------------------------------------------------------------------------------------|-----|
| <sup>1</sup> H-NMR and <sup>13</sup> C-NMR spectra of compound <b>9</b> (Figures S1-S3)    | S3  |
| <sup>1</sup> H-NMR and <sup>13</sup> C-NMR spectra of compound <b>11</b> (Figures S4-S6)   | S5  |
| <sup>1</sup> H-NMR and <sup>13</sup> C-NMR spectra of compound <b>16</b> (Figures S7-S9)   | S7  |
| <sup>1</sup> H-NMR and <sup>13</sup> C-NMR spectra of compound <b>17</b> (Figures S10-S12) | S9  |
| Characterization of AuGNP <b>1</b> (Figures S13-S16)                                       | S11 |
| Characterization of AuGNP <b>2</b> (Figures S17-S20)                                       | S13 |
| Characterization of AuGNP <b>3</b> (Figures S21-S24)                                       | S15 |
| Characterization of AuGNP <b>4</b> (Figures S25-S28)                                       | S17 |
| Characterization of AuGNP <b>5</b> (Figures S29-S32)                                       | S19 |
| Characterization Table for AuGNP <b>1-7</b> (Table S1)                                     | S21 |
| Inhibition assays of AuGNPs <b>1-5</b> (Figures S33-S37)                                   | S23 |

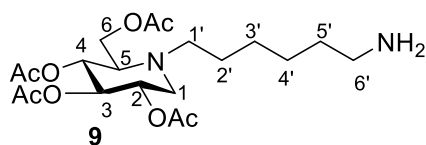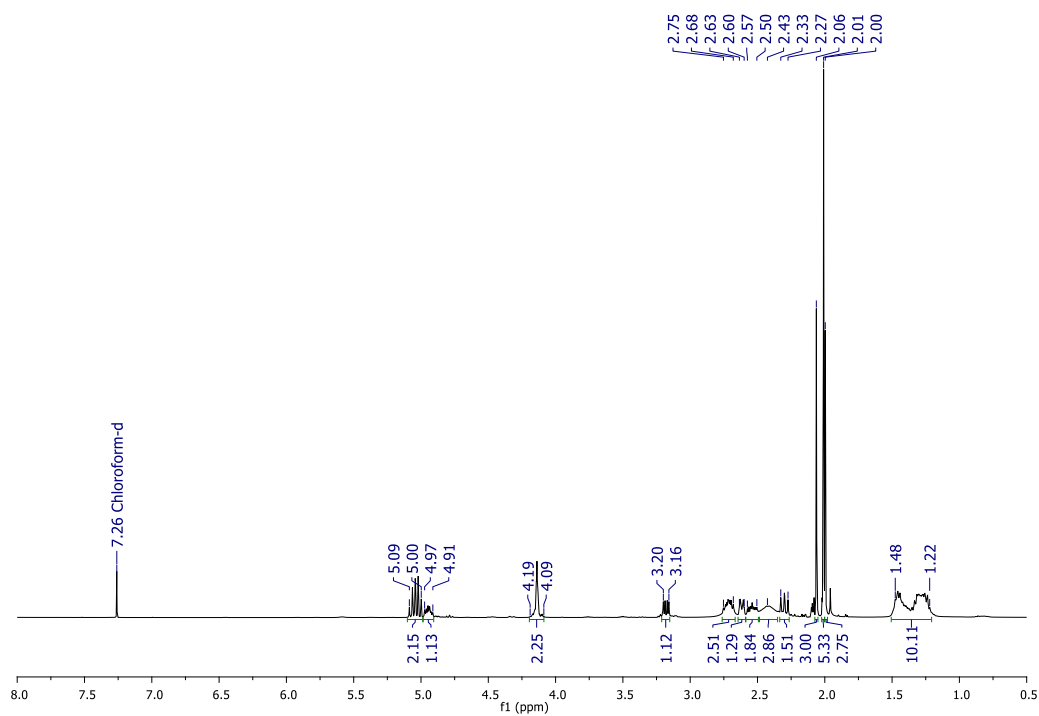

**Figure S1.**  $^1\text{H}$ -NMR spectrum of compound **9** (400 MHz,  $\text{CDCl}_3$ ).

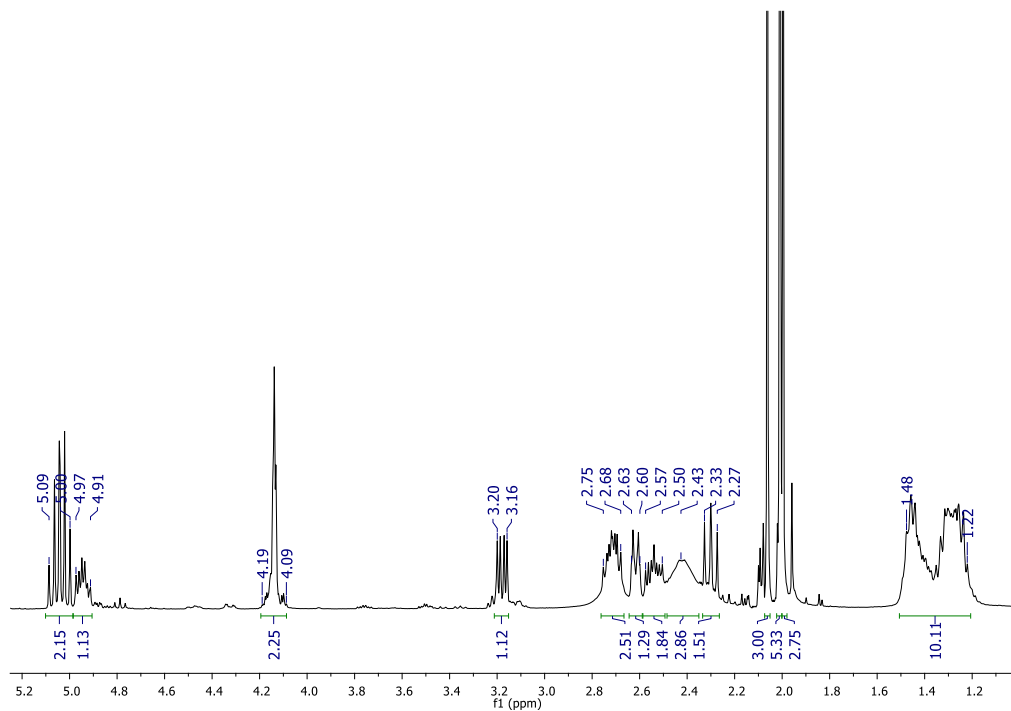

**Figure S2.** Expansion of  $^1\text{H}$ -NMR spectrum of compound **9** (400 MHz,  $\text{CDCl}_3$ ).

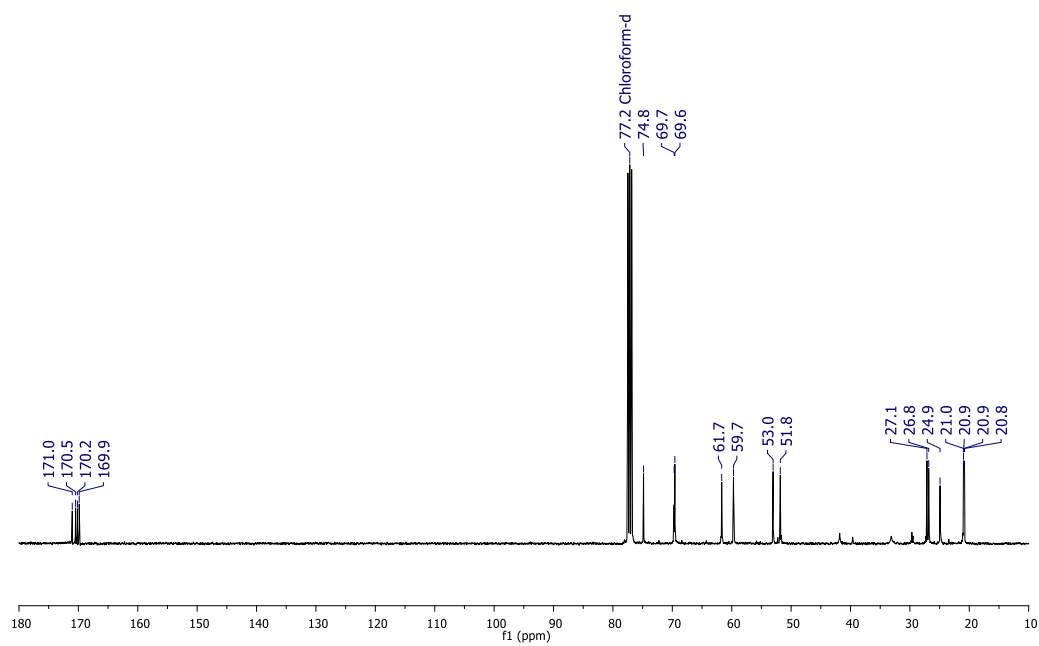

**Figure S3.**  $^{13}\text{C}$ -NMR spectrum of compound **9** (100 MHz,  $\text{CDCl}_3$ ).

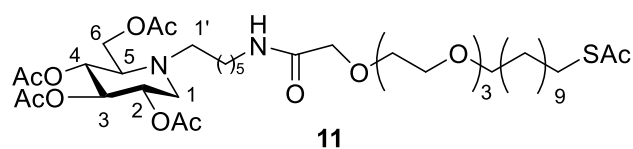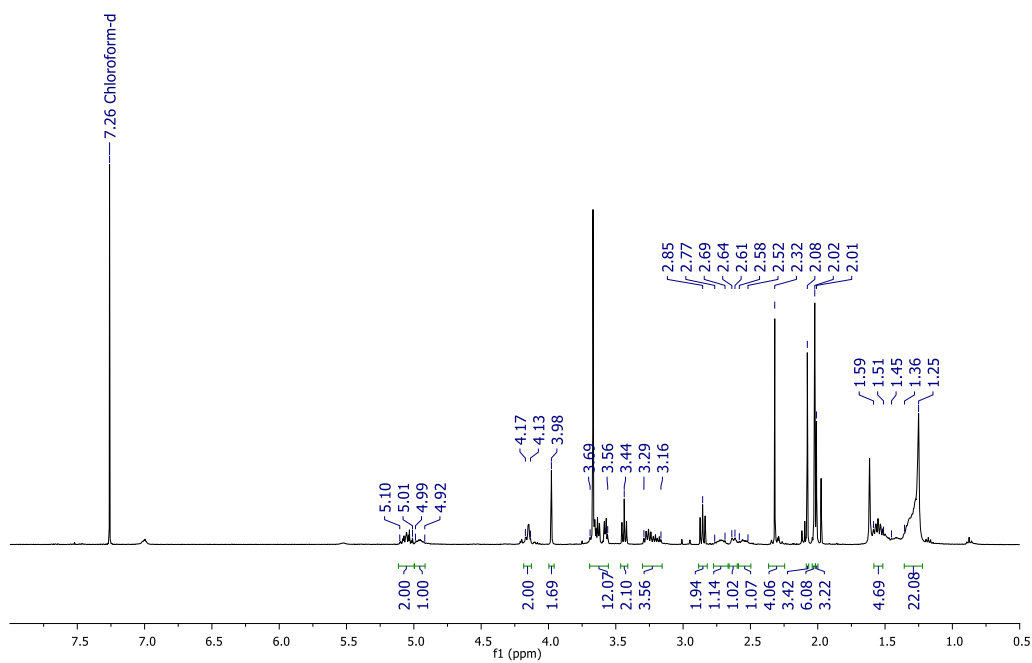

**Figure S4.**  $^1\text{H}$ -NMR spectrum of compound **11** (400 MHz,  $\text{CDCl}_3$ ).

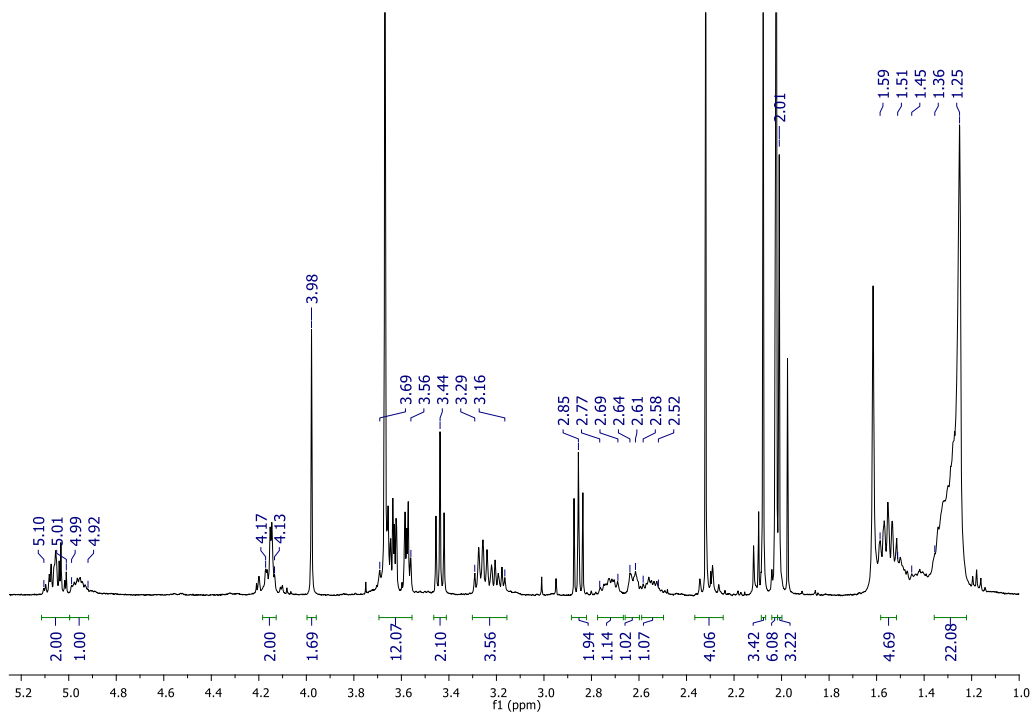

**Figure S5.** Expansion of  $^1\text{H}$ -NMR spectrum of compound **11** (400 MHz,  $\text{CDCl}_3$ ).

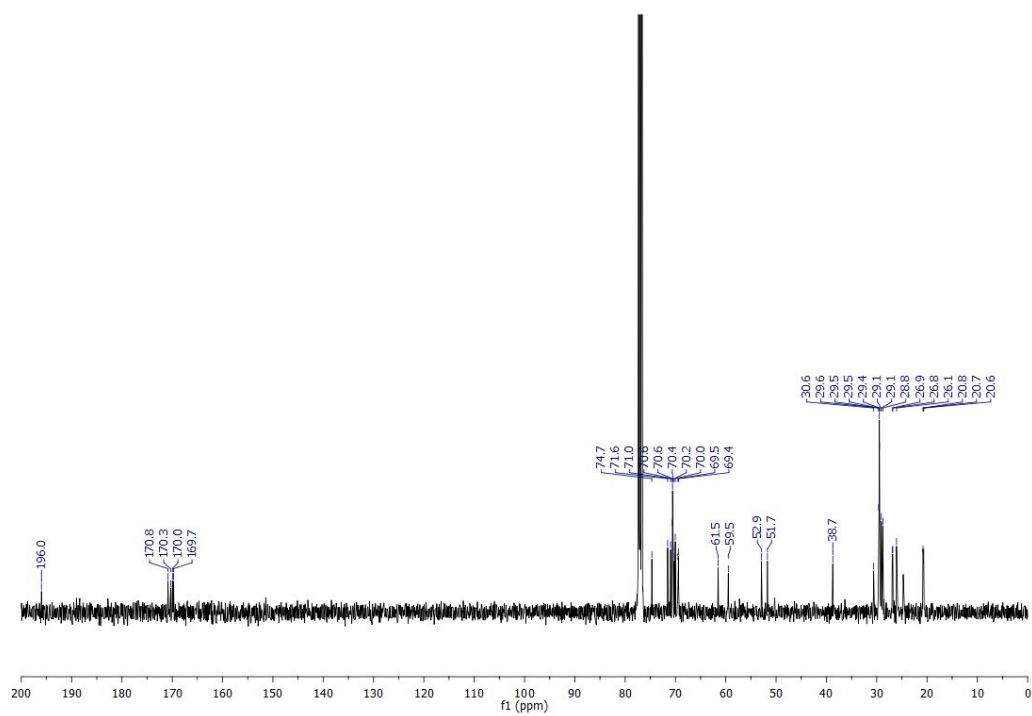

**Figure S6.** <sup>13</sup>C-NMR spectrum of compound **11** (100 MHz, CDCl<sub>3</sub>).

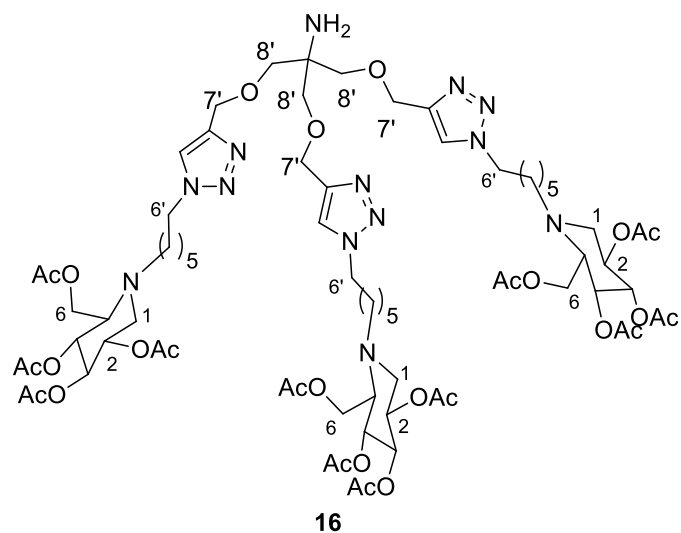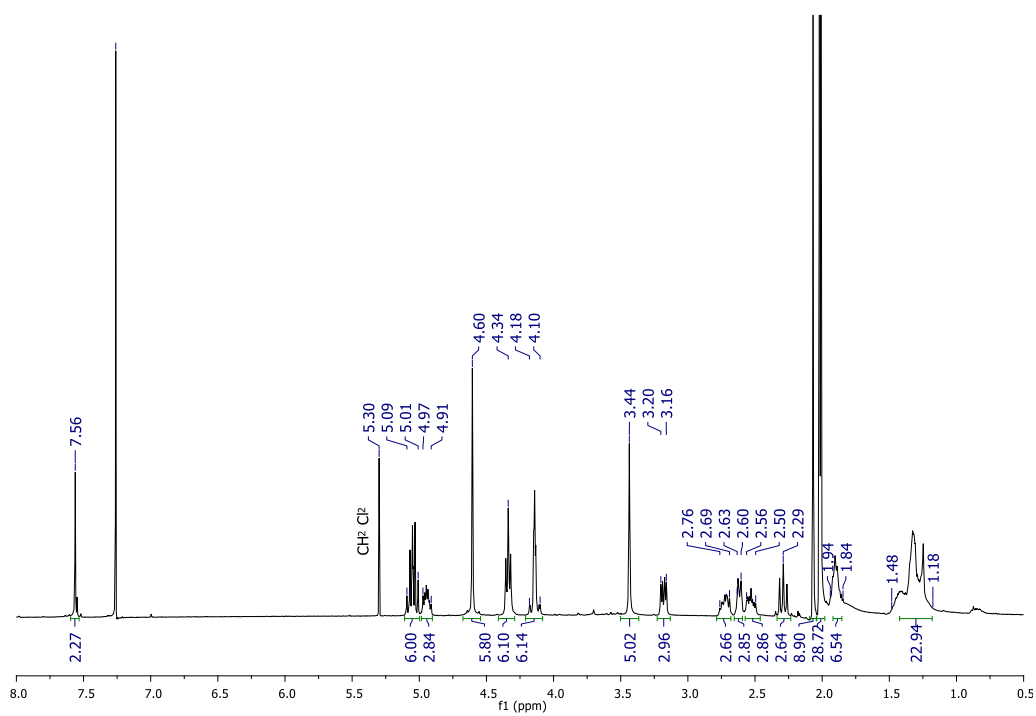

**Figure S7.** <sup>1</sup>H-NMR spectrum of compound **16** (400 MHz, CDCl<sub>3</sub>).

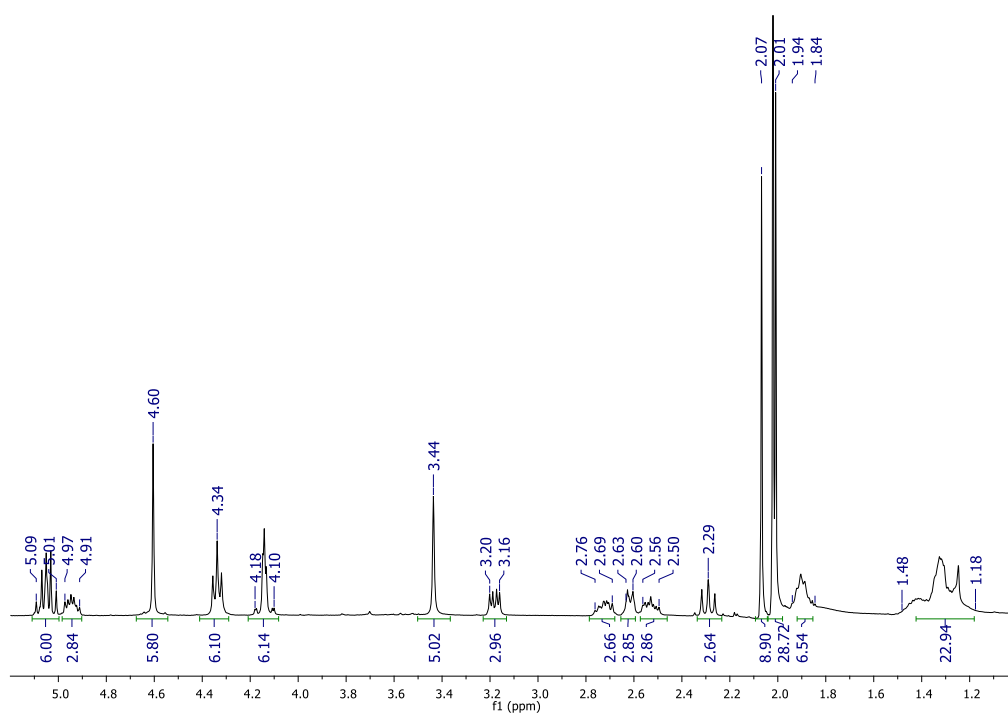

**Figure S8.** Expansion of <sup>1</sup>H-NMR spectrum of compound **16** (400 MHz, CDCl<sub>3</sub>).

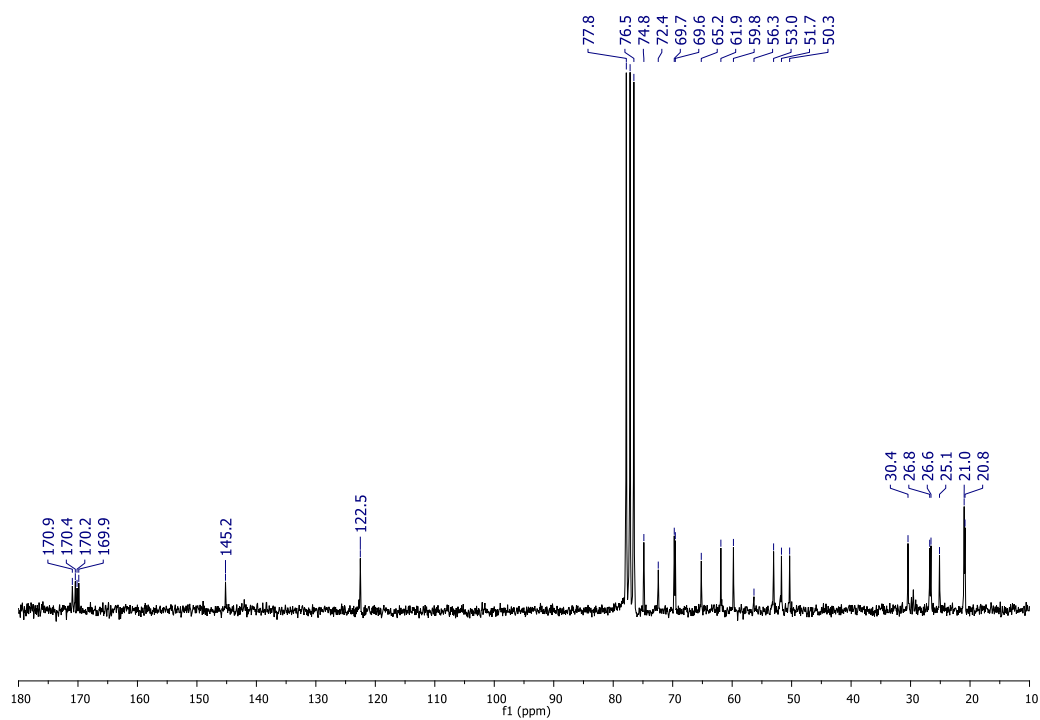

**Figure S9.** <sup>13</sup>C-NMR spectrum of compound **16** (100 MHz, CDCl<sub>3</sub>).



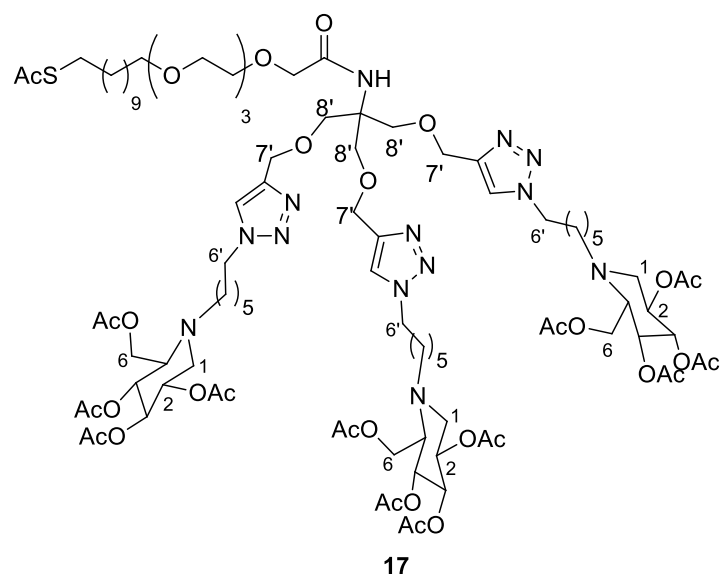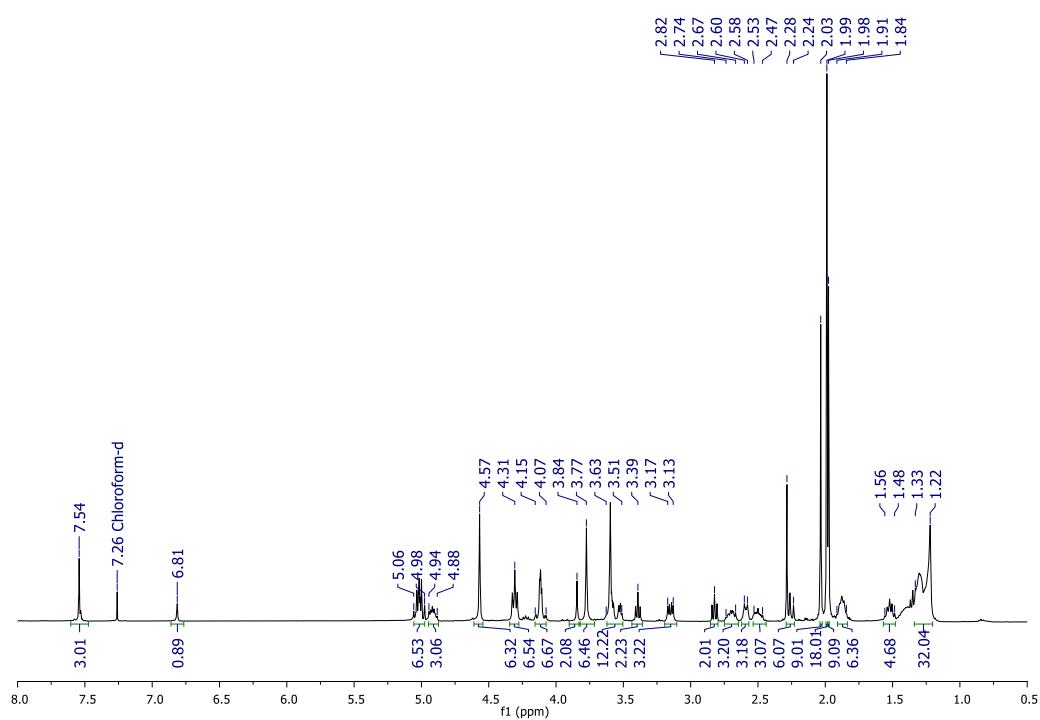

**Figure S10.**  $^1\text{H}$ -NMR spectrum of compound **17** (400 MHz,  $\text{CDCl}_3$ ).

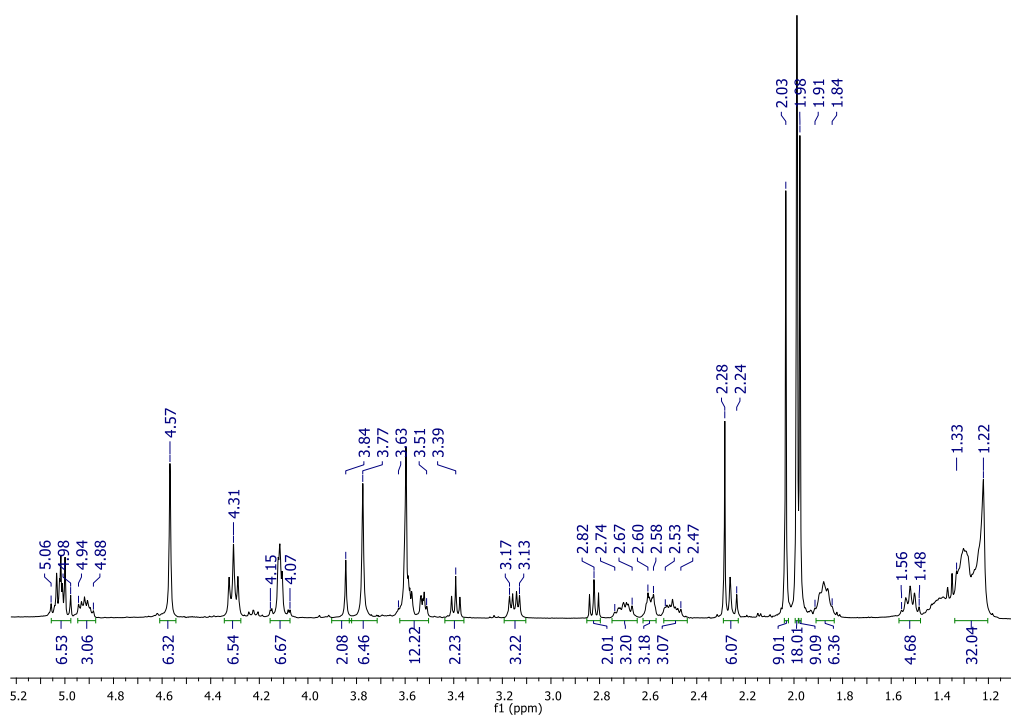

**Figure S11.** Expansion of <sup>1</sup>H-NMR spectrum of compound **17** (400 MHz, CDCl<sub>3</sub>).

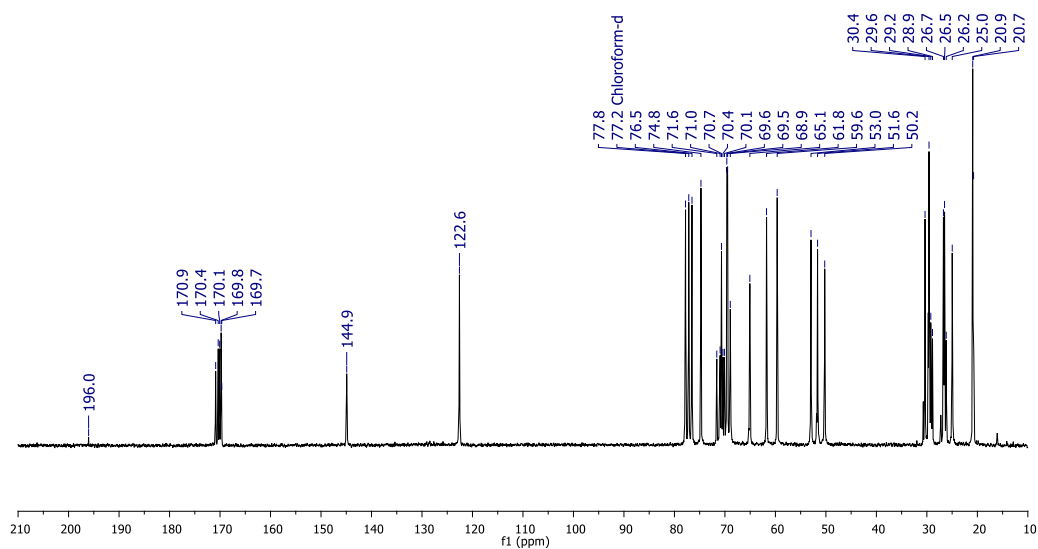

**Figure S12.** <sup>13</sup>C-NMR spectrum of compound **17** (100 MHz, CDCl<sub>3</sub>).

## Characterization of AuGNP 1

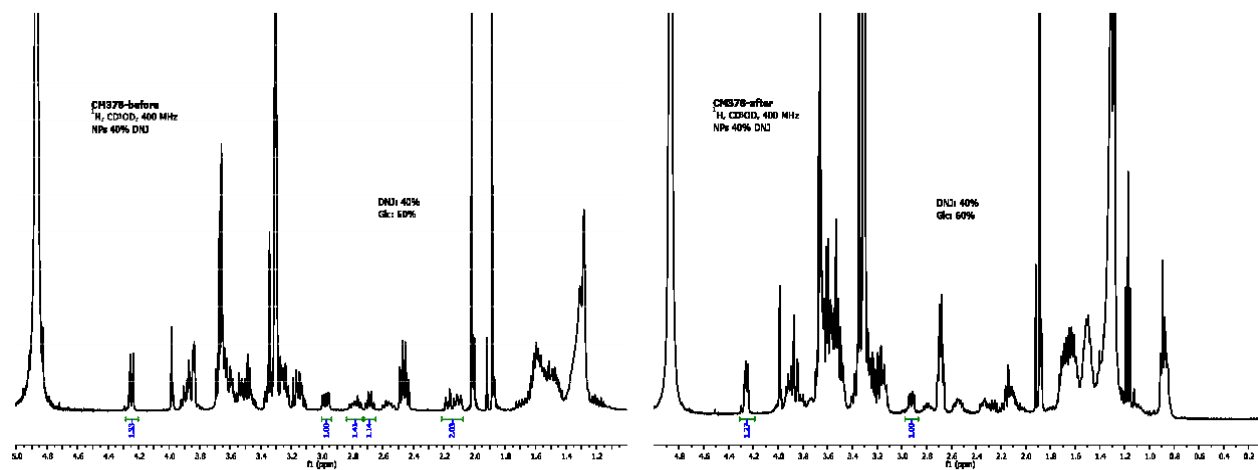

**Figure S13.**  $^1\text{H}$  NMR of sugar/iminosugar ligands mixture before (left) and after (right) formation of AuGNP 1 (400 MHz,  $\text{CD}_3\text{OD}$ ).

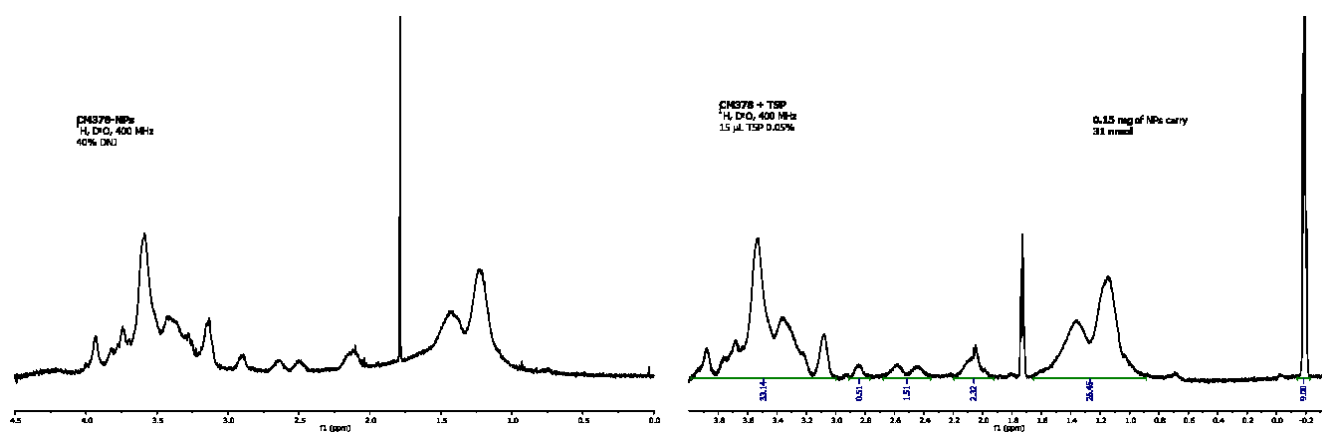

**Figure S14.**  $^1\text{H}$  NMR and  $^1\text{H}$  qNMR with TSP- $\text{d}_4$  of AuGNP 1 (400 MHz,  $\text{D}_2\text{O}$ ).

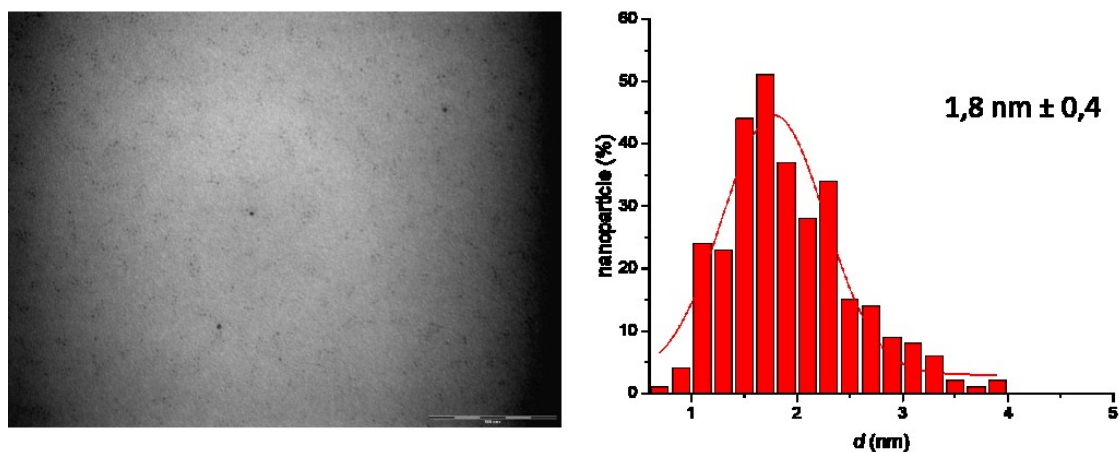

**Figure S15.** TEM micrograph (scale = 100 nm) in H<sub>2</sub>O and size-distribution histogram obtained by measuring 300 nanoparticles of AuGNP 1 (average diameter: 1.8 ± 0.4 nm).

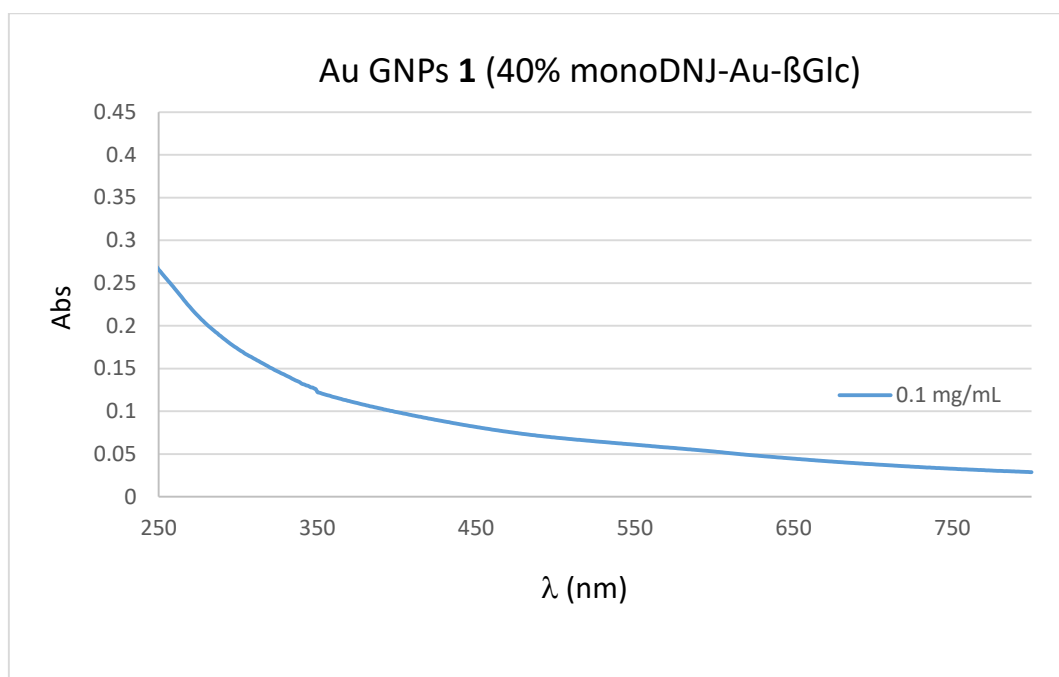

**Figure S16.** UV/vis spectrum of H<sub>2</sub>O solution of AuGNP 1 recorded at concentration of 0.1 mg/mL.

## Characterization of AuGNP 2

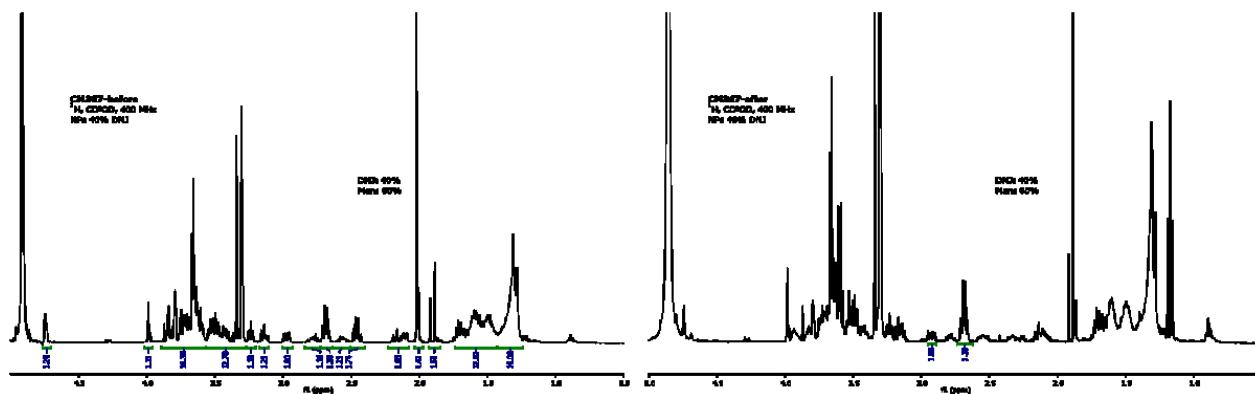

**Figure S17.**  $^1\text{H}$  NMR of sugar/iminosugar ligands mixture before (left) and after (right) formation of AuGNP 2 (400 MHz,  $\text{CD}_3\text{OD}$ ).

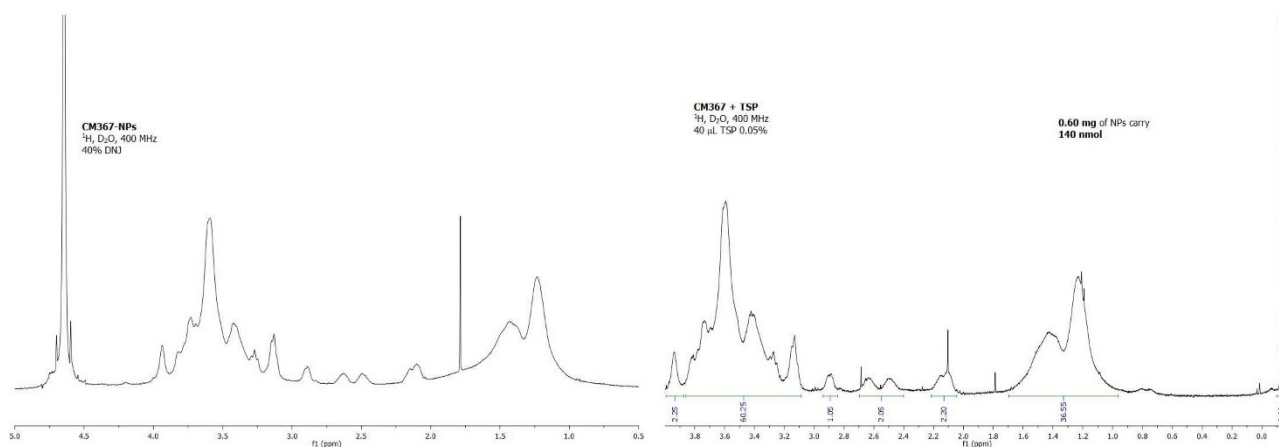

**Figure S18.**  $^1\text{H}$  NMR and  $^1\text{H}$  qNMR with TSP- $\text{d}_4$  of AuGNP 2 (400 MHz,  $\text{D}_2\text{O}$ ).

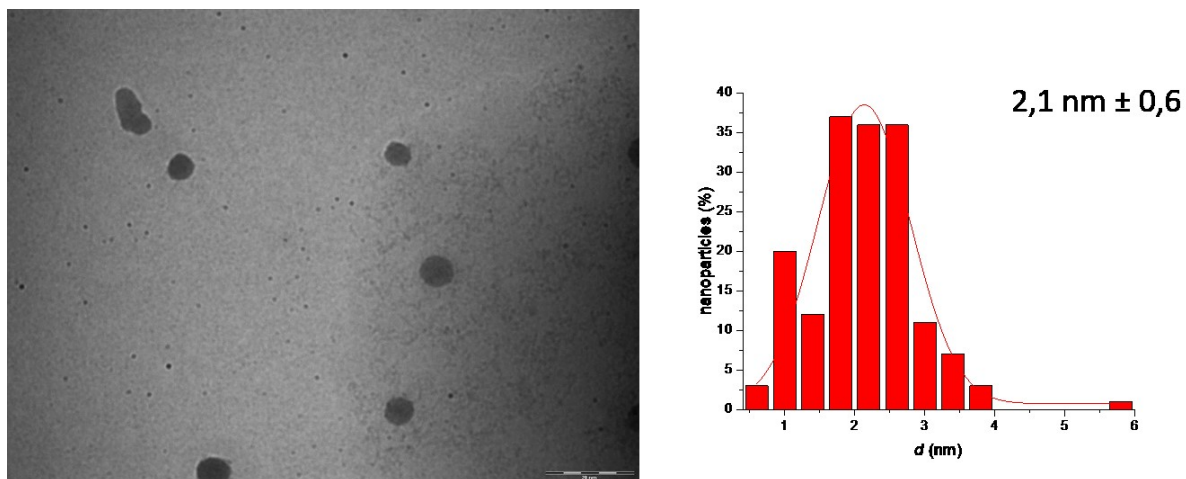

**Figure S19.** TEM micrograph (scale = 20 nm) in H<sub>2</sub>O and size-distribution histogram obtained by measuring 300 nanoparticles of AuGNP **2** (average diameter: 2.1 ± 0.6 nm, less than 3% shows a >5 nm diameter).

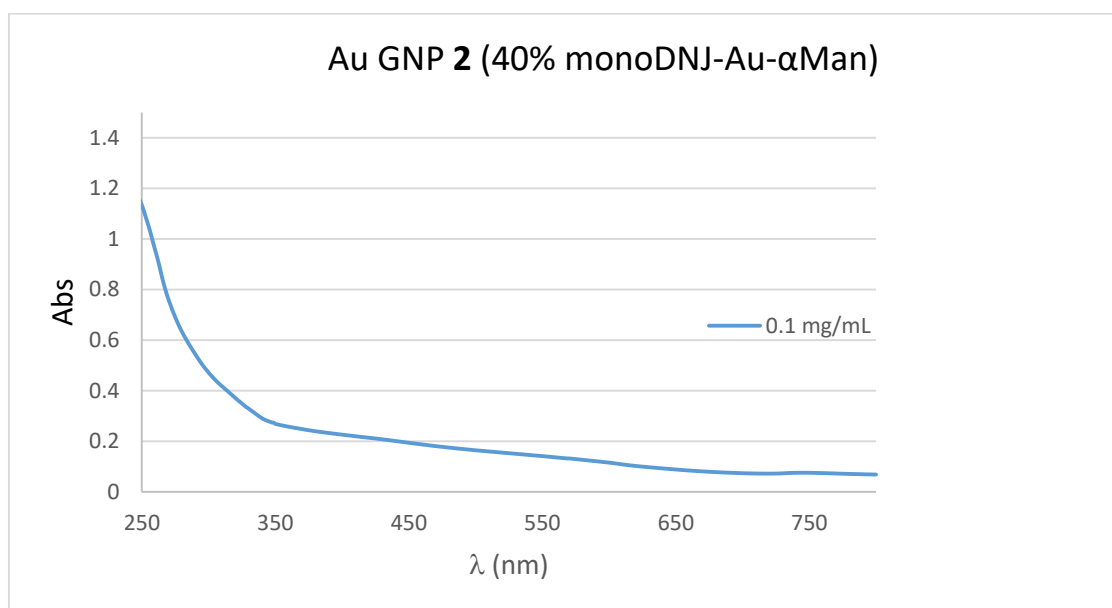

**Figure S20.** UV/vis spectrum of H<sub>2</sub>O solution of AuGNP **2** recorded at concentration of 0.1 mg/mL.

**Left Spectrum: C72-HPs**  
 $^1\text{H}$  NMR (400 MHz,  $\text{CDCl}_3$ )  
 10%  $\text{Me}_2\text{SO}$   
 Peaks: ~7.2 ppm (sharp), ~4.8 ppm (broad)

**Right Spectrum: C72 + TSP**  
 $^1\text{H}$  NMR (400 MHz,  $\text{CDCl}_3$ )  
 40  $\mu\text{L}$  TSP 0.05%  
 5.0  $\mu\text{g}$  of HPs carry  
 170 nmol  
 Peaks: ~7.2 ppm (sharp), ~4.8 ppm (broad)  
 Integration values: 0.03, 7.46, 10.46, 86.04, 4.15, 15.16, 15.24, 15.01, 67.46, 0.03

S15

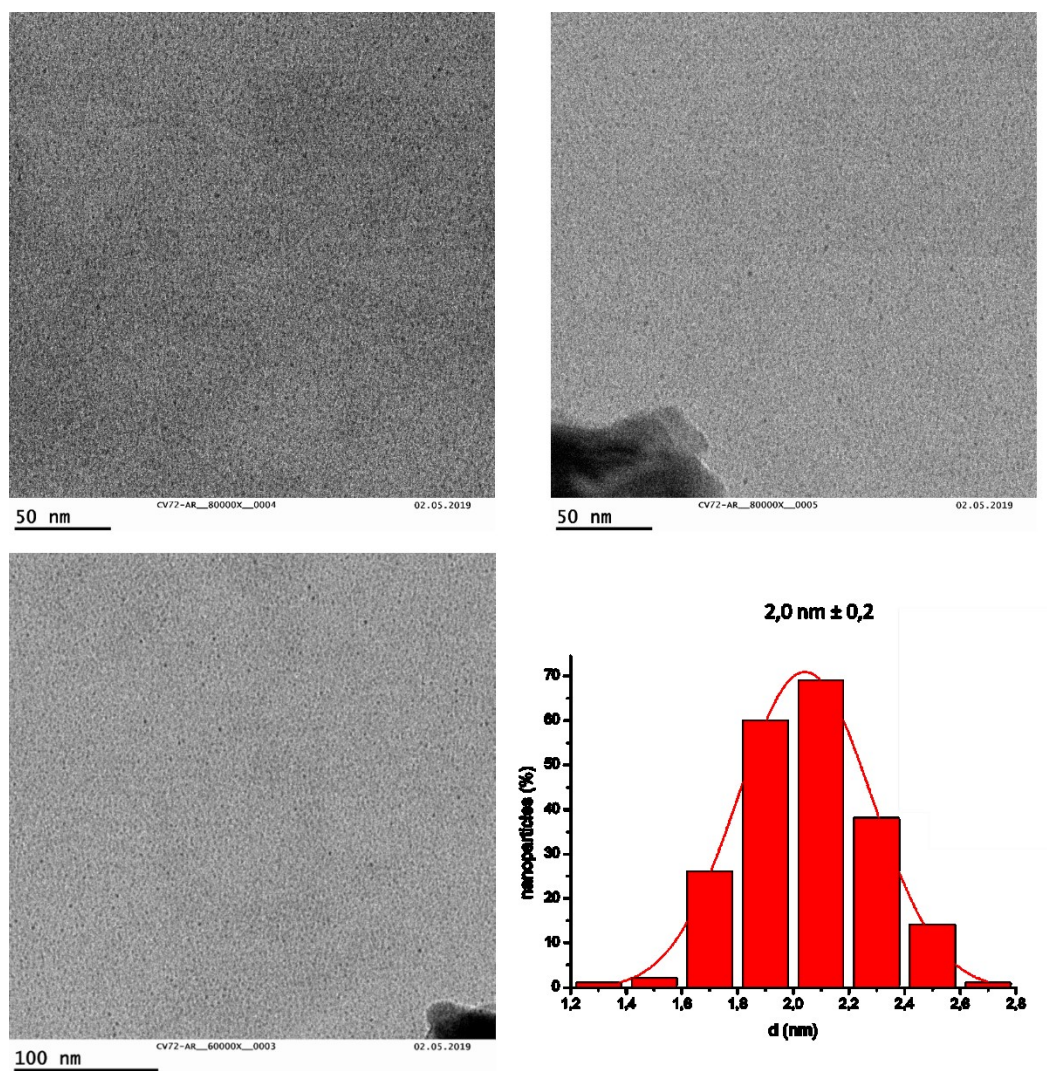

**Figure S23.** TEM micrographs in H<sub>2</sub>O (magnification 80000x and 60000x) and size-distribution histogram obtained by measuring 300 nanoparticles of AuGNP **3** (average diameter: 2.1 ± 0.5 nm).

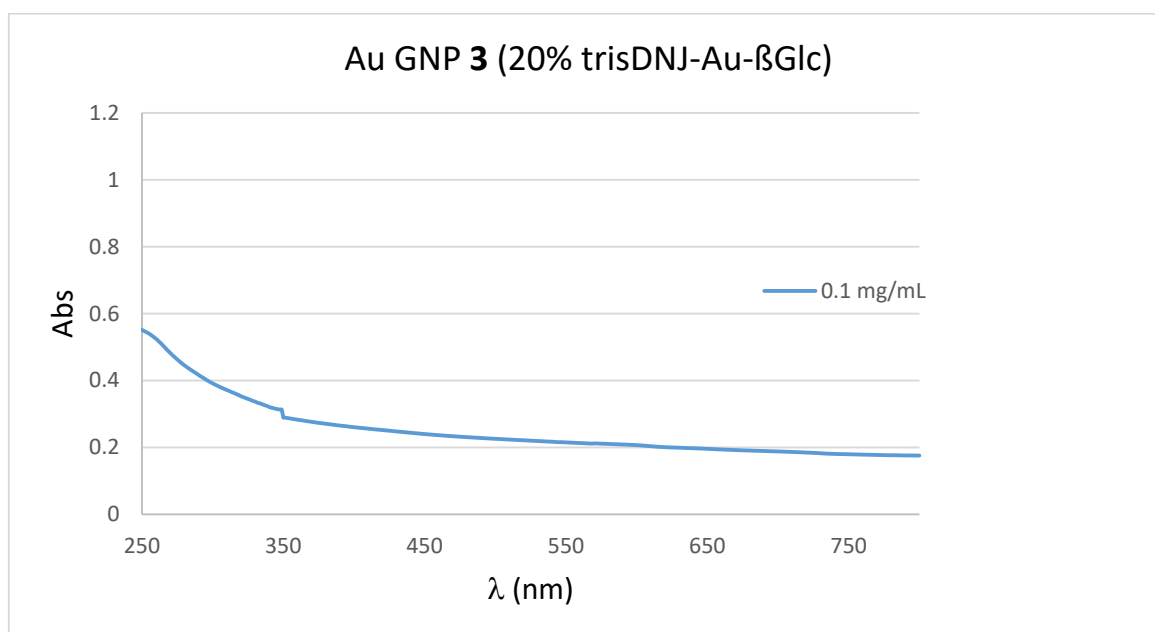

**Figure S24.** UV/vis spectrum of H<sub>2</sub>O solution of AuGNP **3** recorded at concentration of 0.1 mg/



## Characterization of AuGNP 4

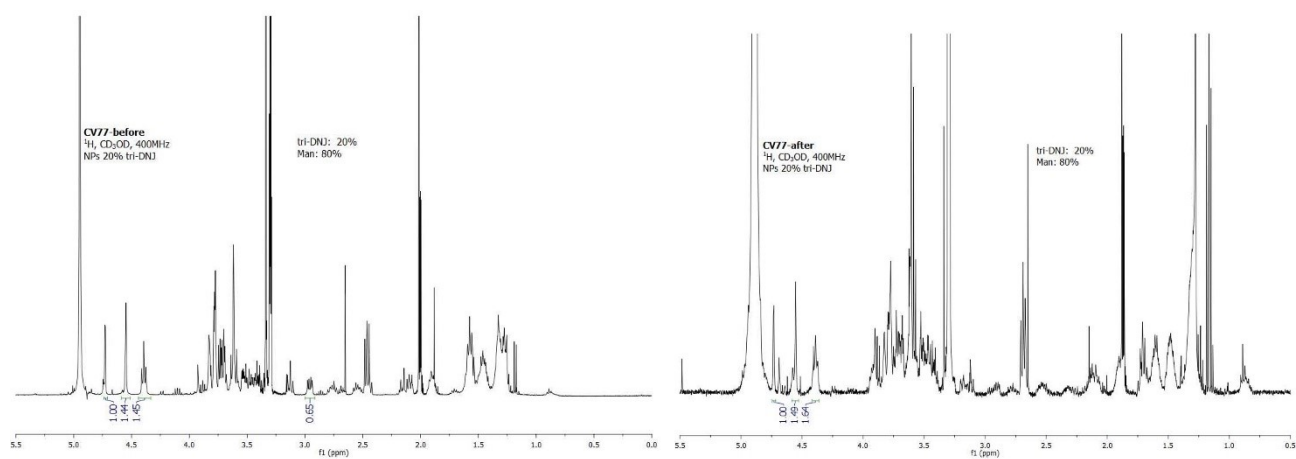

**Figure S25.**  $^1\text{H}$  NMR of sugar/iminosugar ligands mixture before (left) and after (right) formation of AuGNP 4 (400 MHz,  $\text{CD}_3\text{OD}$ ).

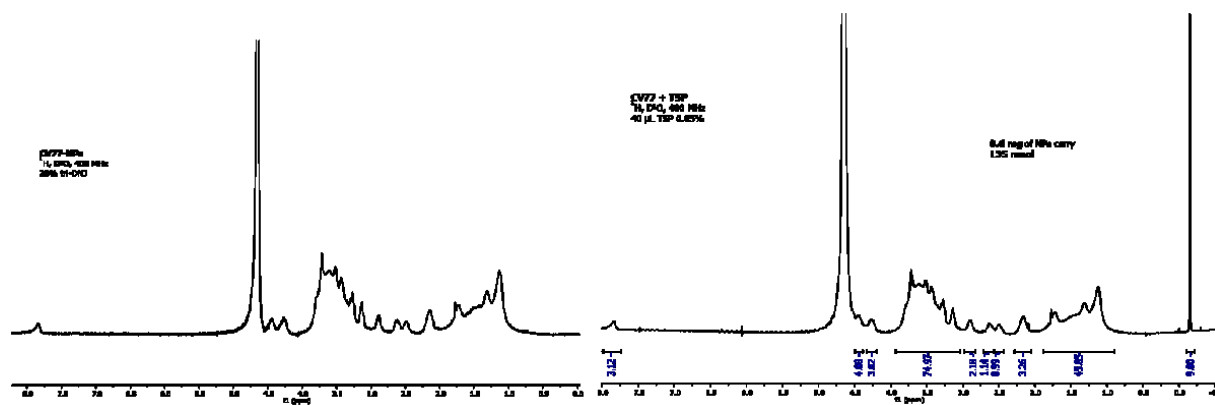

**Figure S26.**  $^1\text{H}$  NMR and  $^1\text{H}$  qNMR with TSP- $\text{d}_4$  of AuGNP 4 (400 MHz,  $\text{D}_2\text{O}$ ).

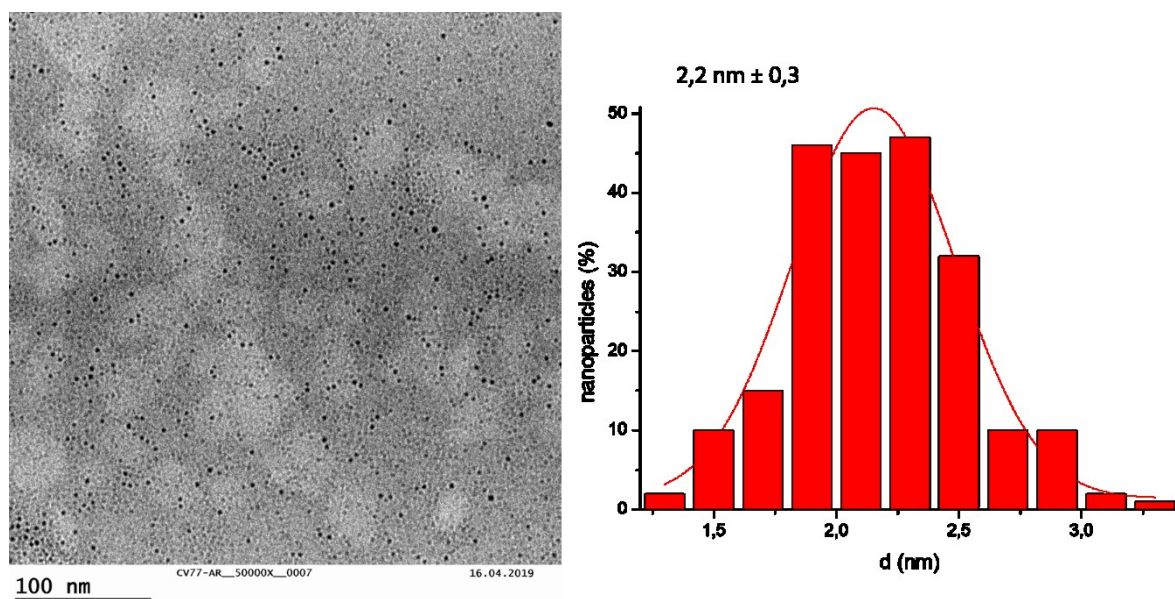

**Figure S27.** TEM micrograph in H<sub>2</sub>O and size-distribution histogram obtained by measuring 300 nanoparticles of AuGNP 4 (average diameter: 2.0 ± 0.4 nm).

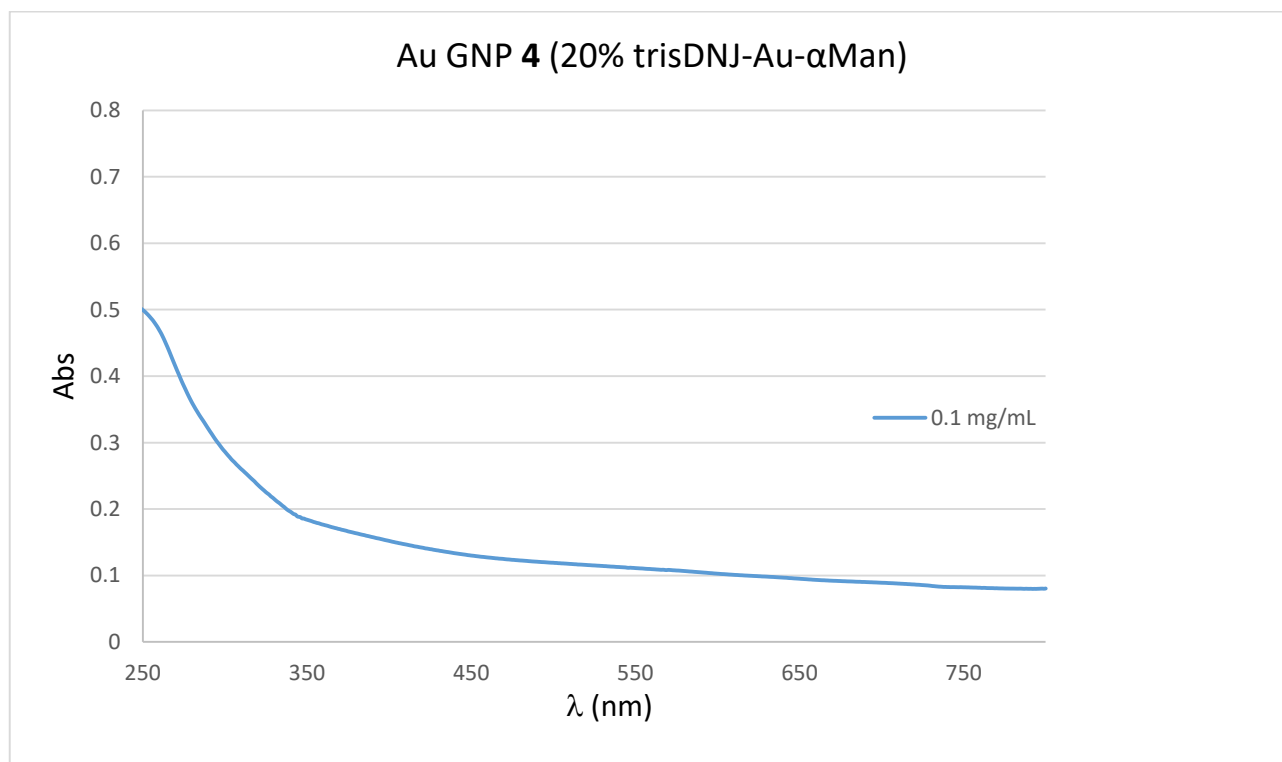

**Figure S28.** UV/vis spectrum of H<sub>2</sub>O solution of AuGNP 4 recorded at concentration of 0.1 mg/mL.

## Characterization of AuGNP 5

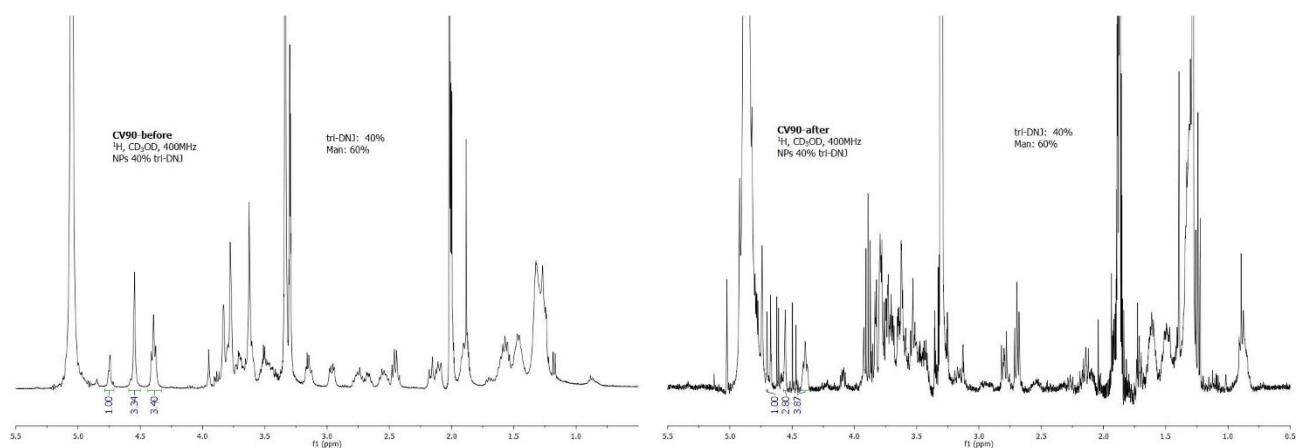

**Figure S29.**  $^1\text{H}$  NMR of sugar/iminosugar ligands mixture before (left) and after (right) formation of AuGNP 5 (400 MHz,  $\text{CD}_3\text{OD}$ ).

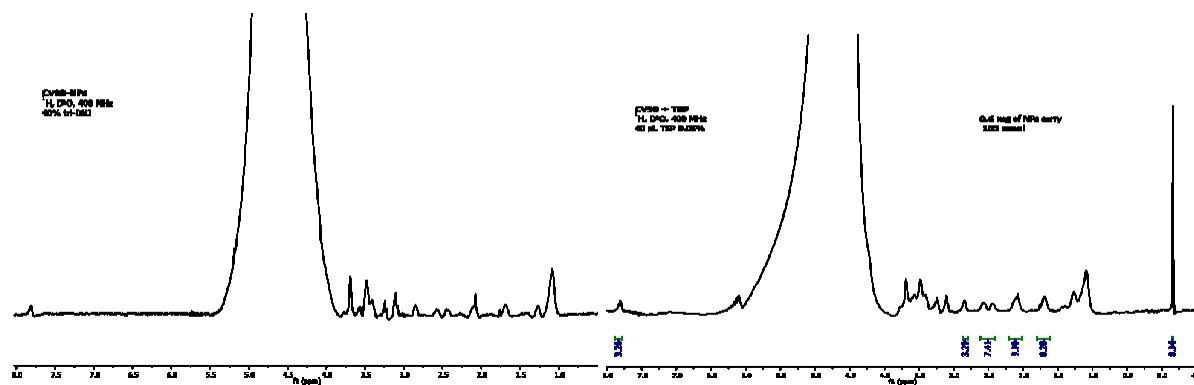

**Figure S30.**  $^1\text{H}$  NMR and  $^1\text{H}$  qNMR with TSP- $\text{d}_4$  of AuGNP 5 (400 MHz,  $\text{D}_2\text{O}$ ).

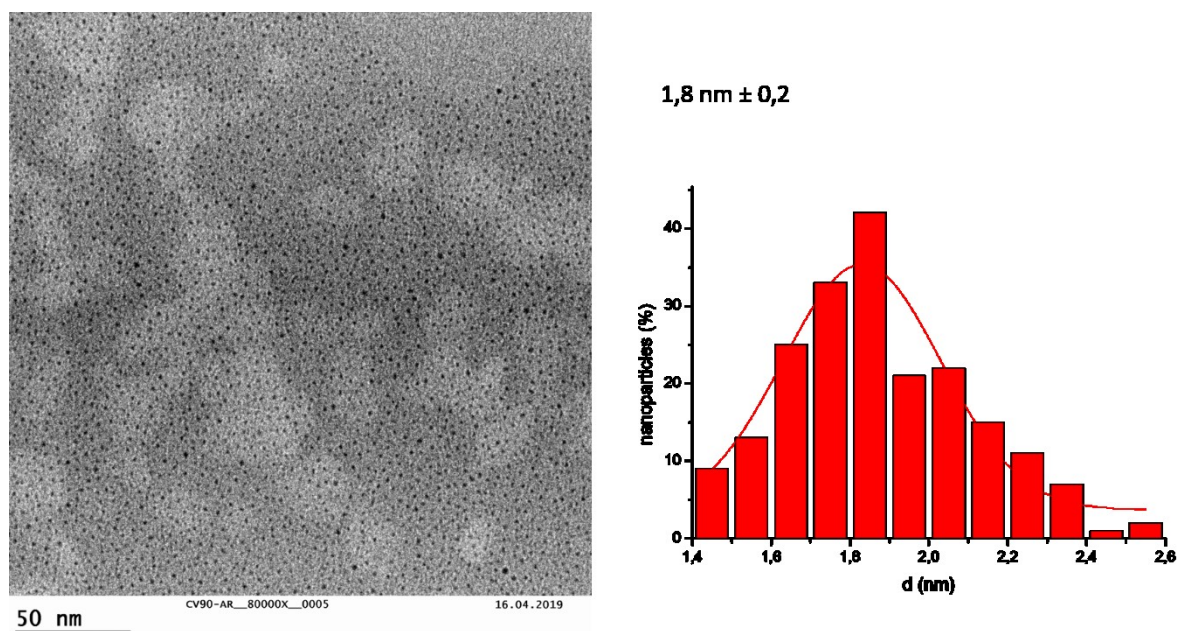

**Figure S31.** TEM micrograph in H<sub>2</sub>O and size-distribution histogram obtained by measuring 300 nanoparticles of AuGNP 5 (average diameter:  $2.1 \pm 0.5$  nm).

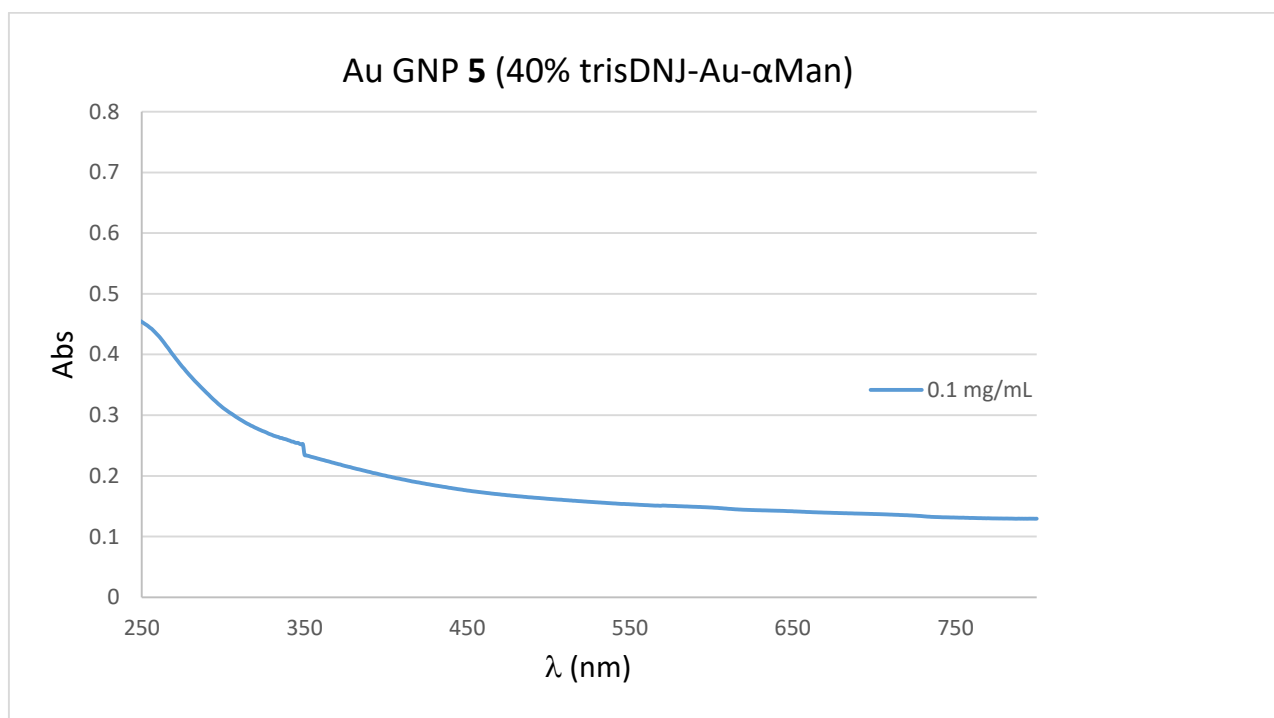

**Figure S32.** UV/vis spectrum of H<sub>2</sub>O solution of AuGNP 5 recorded at concentration of 0.1 mg/mL.

**Table S1.** Summary table of DNJ-based AuGNPs **1-7** and their characterization.

| Au-GNPs <sup>[1]</sup>                                                                                                                                 | Characterization              |                                                                     |
|--------------------------------------------------------------------------------------------------------------------------------------------------------|-------------------------------|---------------------------------------------------------------------|
|                                                                                                                                                        | Gold core size <sup>[2]</sup> | DNJ concentration for 2 mg/mL concentration of AuGNP <sup>[3]</sup> |
| <p><b>1</b></p> <p>40% monoDNJ<br/>60% <math>\beta</math>Glc</p> 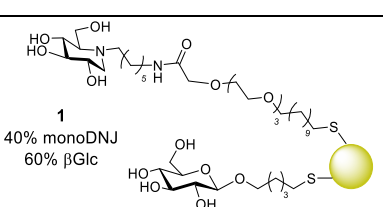     | 1.8 $\pm$ 0.4 nm              | 413 $\mu$ M                                                         |
| <p><b>2</b></p> <p>40% monoDNJ<br/>60% <math>\alpha</math>Man</p>     | 2.1 $\pm$ 0.6 nm              | 467 $\mu$ M                                                         |
| <p><b>3</b></p> <p>20% tris-DNJ<br/>80% <math>\beta</math>Glc</p>    | 2.1 $\pm$ 0.5 nm              | 567 $\mu$ M                                                         |
| <p><b>4</b></p> <p>20% tris-DNJ<br/>80% <math>\alpha</math>Man</p>  | 2.0 $\pm$ 0.4 nm              | 450 $\mu$ M                                                         |

|                                                                                                                                                   |                                  |                              |
|---------------------------------------------------------------------------------------------------------------------------------------------------|----------------------------------|------------------------------|
| 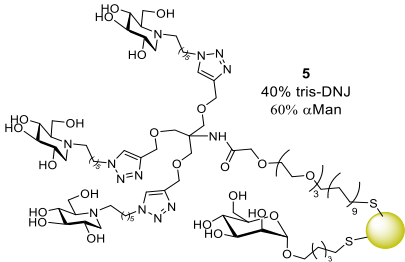 <p><b>5</b><br/>40% tris-DNJ<br/>60% <math>\alpha</math>Man</p> | <p>2.1<math>\pm</math>0.5 nm</p> | <p>503 <math>\mu</math>M</p> |
|  <p><b>6</b><br/>100% Au-<math>\beta</math>Glc</p>               | <p>1.7<math>\pm</math>0.4 nm</p> | <p>/</p>                     |
|  <p><b>7</b><br/>100% Au-<math>\alpha</math>Man</p>              | <p>1.6<math>\pm</math>0.4 nm</p> | <p>/</p>                     |

[1] The given percentages refer to the proportion of the ligands on the gold surface as determined by recording  $^1\text{H}$  NMR spectrum of their initial mixture before the formation of the AuGNPs and confirmed by  $^1\text{H}$  NMR spectrum of the supernatant after the AuGNPs formation. [2] Determined by Transmission Electron Microscopy (TEM). [3] Determined on the basis of qNMR analysis.

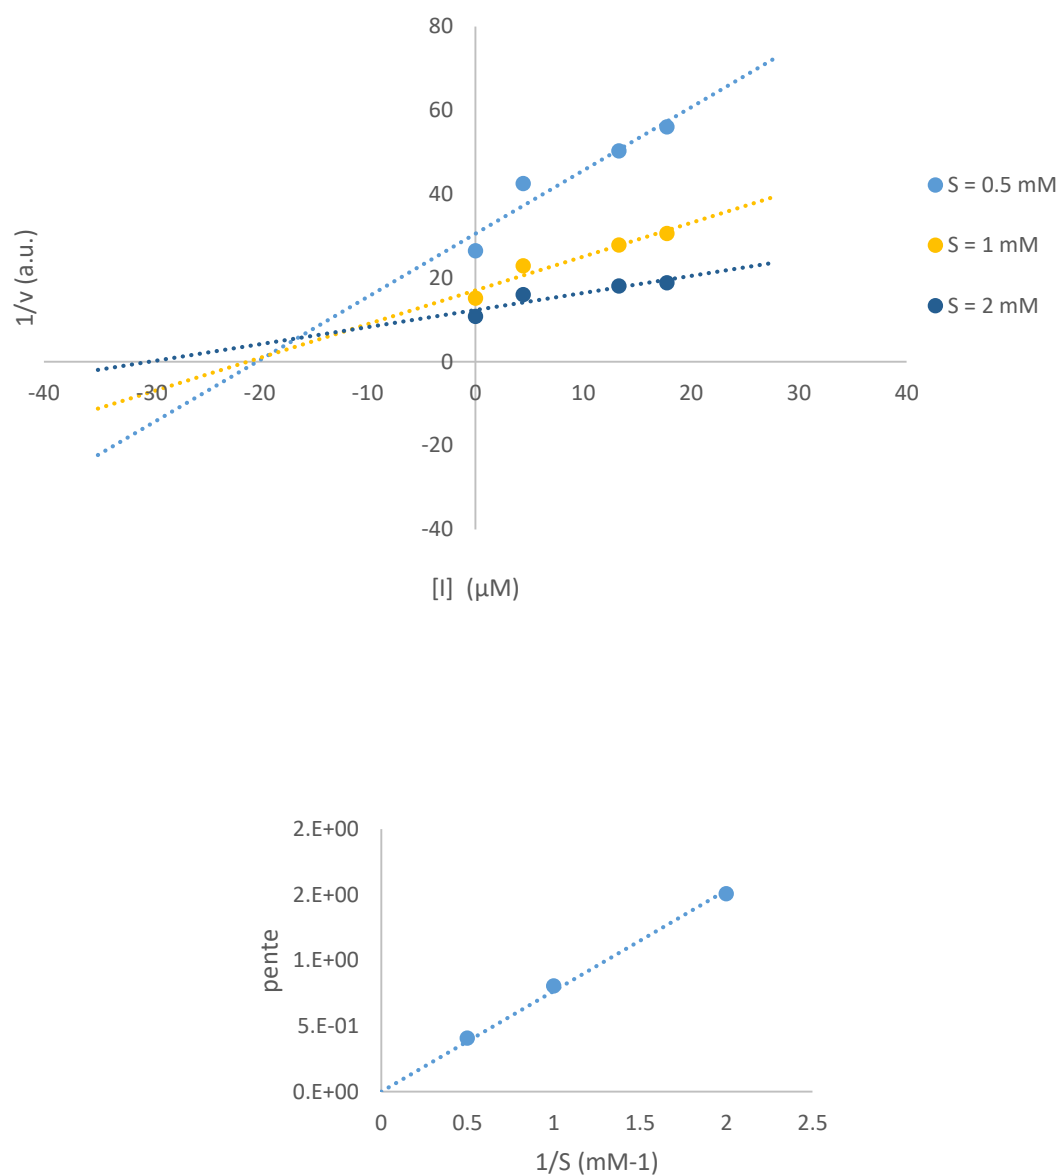

**Figure S33.** Dixon plot for  $K_i$  determination of compound AuGNP **1** against JB $\alpha$ -man and replot of the slopes showing competitive mode.  $K_i = 16 \pm 2 \mu\text{M}$ .

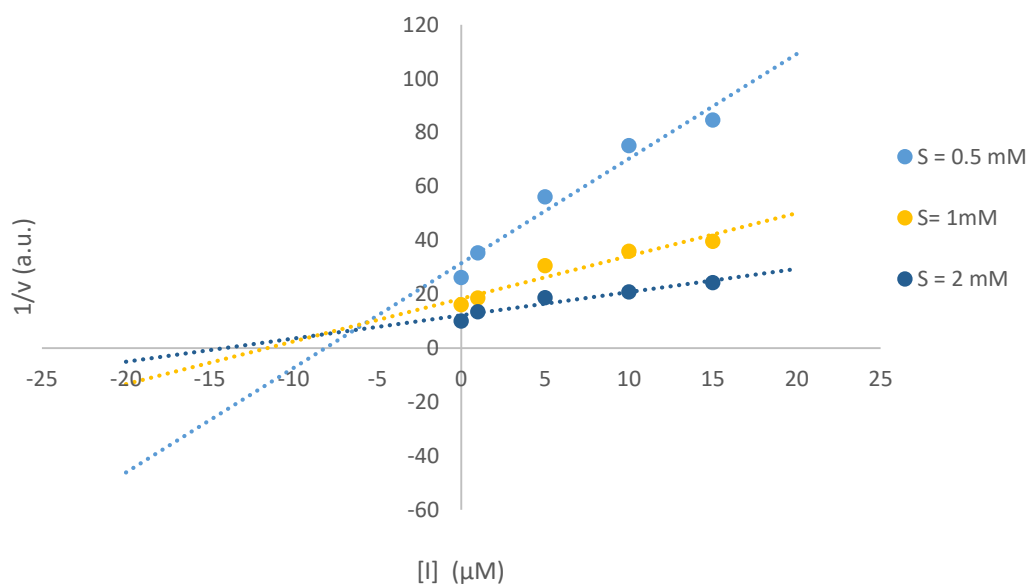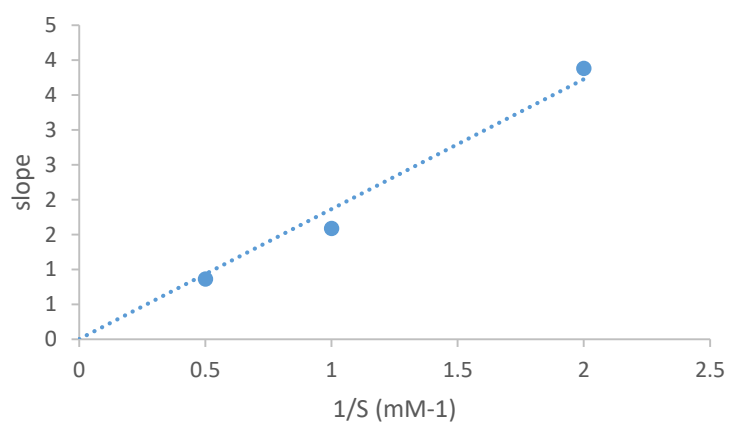

**Figure S34.** Dixon plot for  $K_i$  determination of compound AuGNP **2** against JB $\alpha$ -man and replot of the slopes showing competitive mode.  $K_i = 8 \pm 2 \mu\text{M}$ .



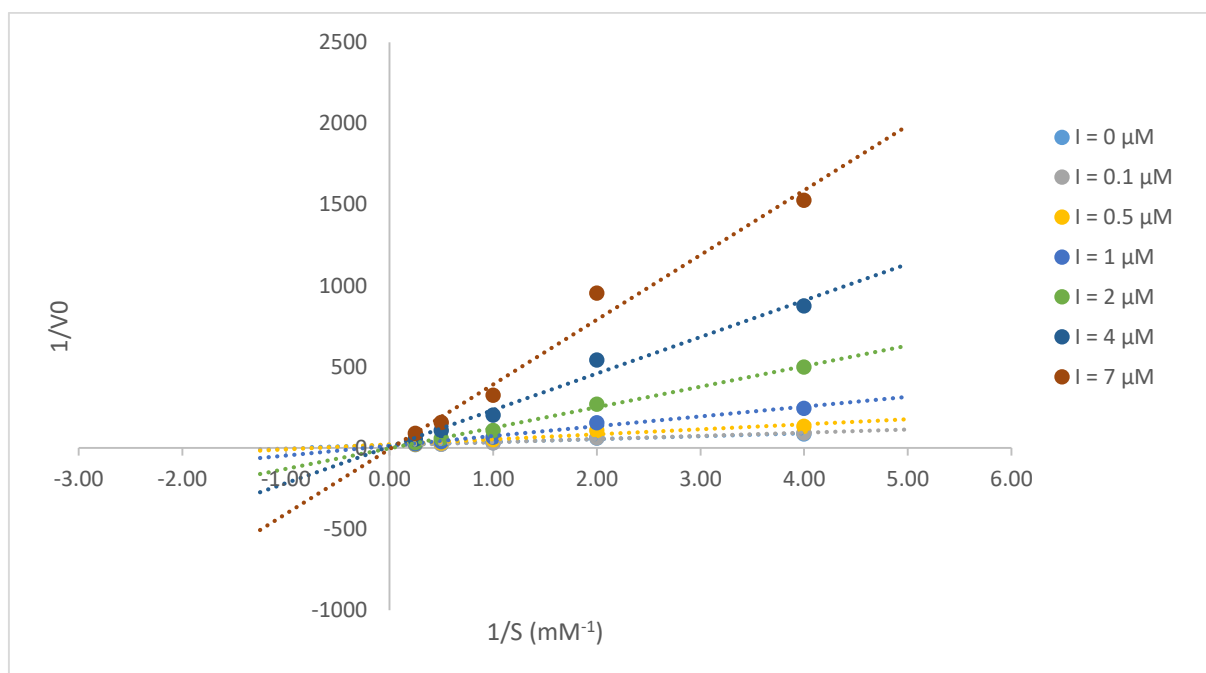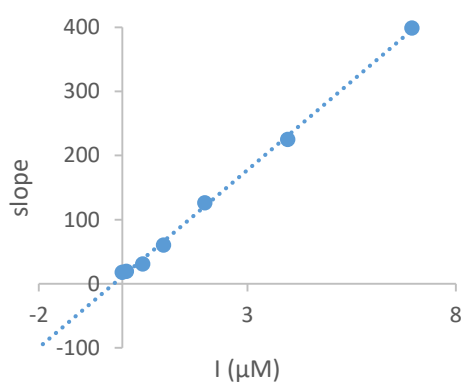

**Figure S35.** Lineweaver-Burk plots and replot of the slope versus inhibitor concentration for  $K_i$  determination of compound AuGNP **3** against JB $\alpha$ -man.  
 $K_i = 0.198 \pm 0.060 \mu\text{M}$ .

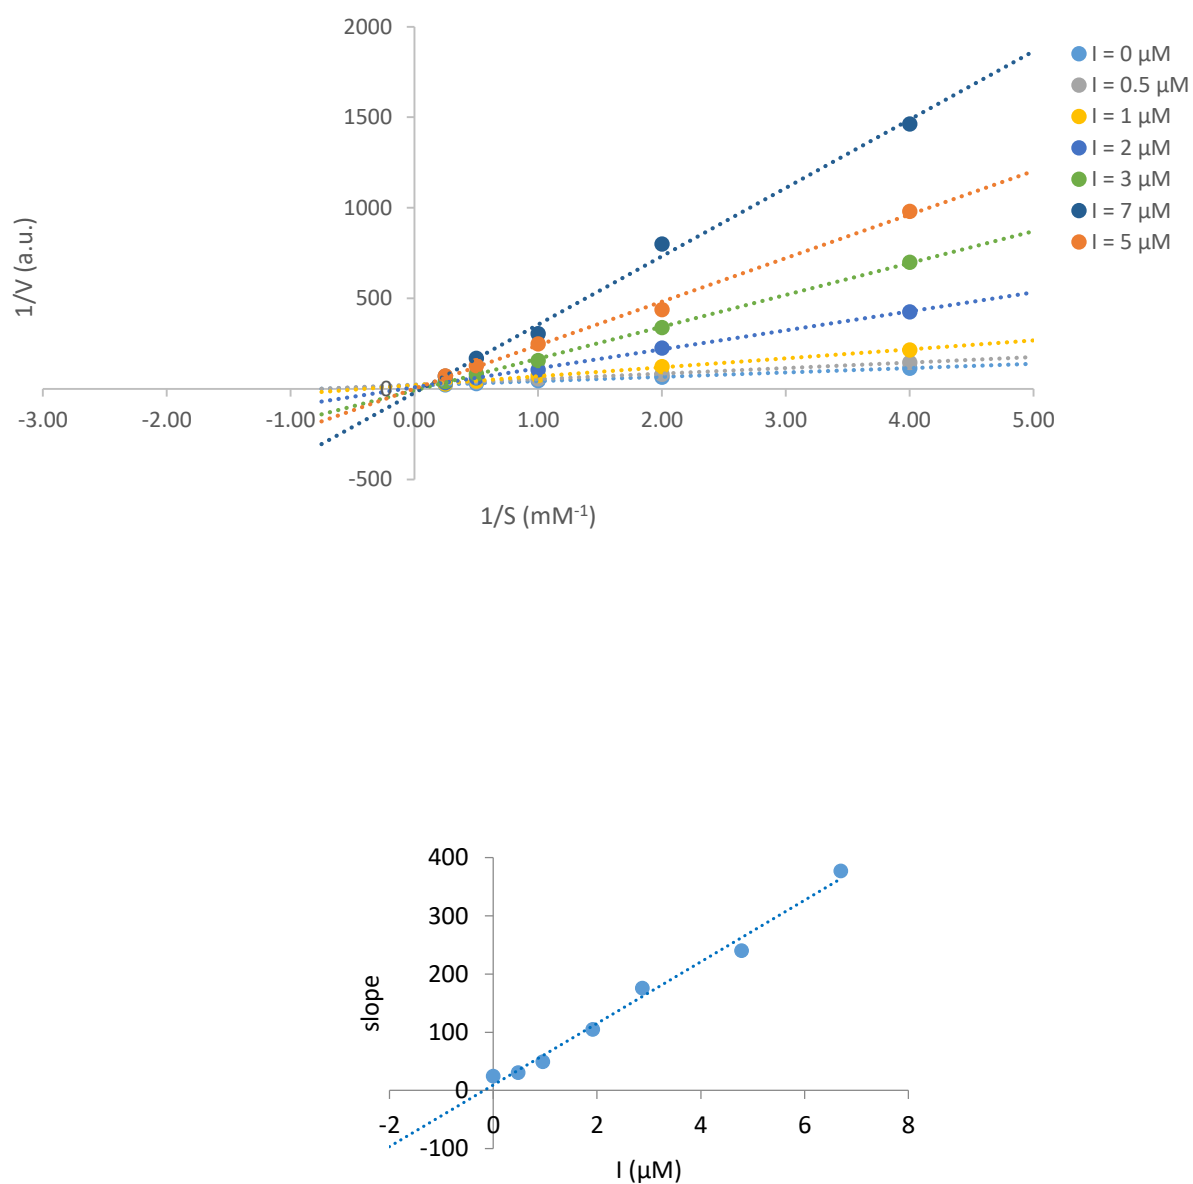

**Figure S36.** Lineweaver-Burk plots and replot of the slope versus inhibitor concentration for  $K_i$  determination of compound AuGNP **4** against JB $\alpha$ -man.  
 $K_i = 0.175 \pm 0.171 \mu\text{M}$ .

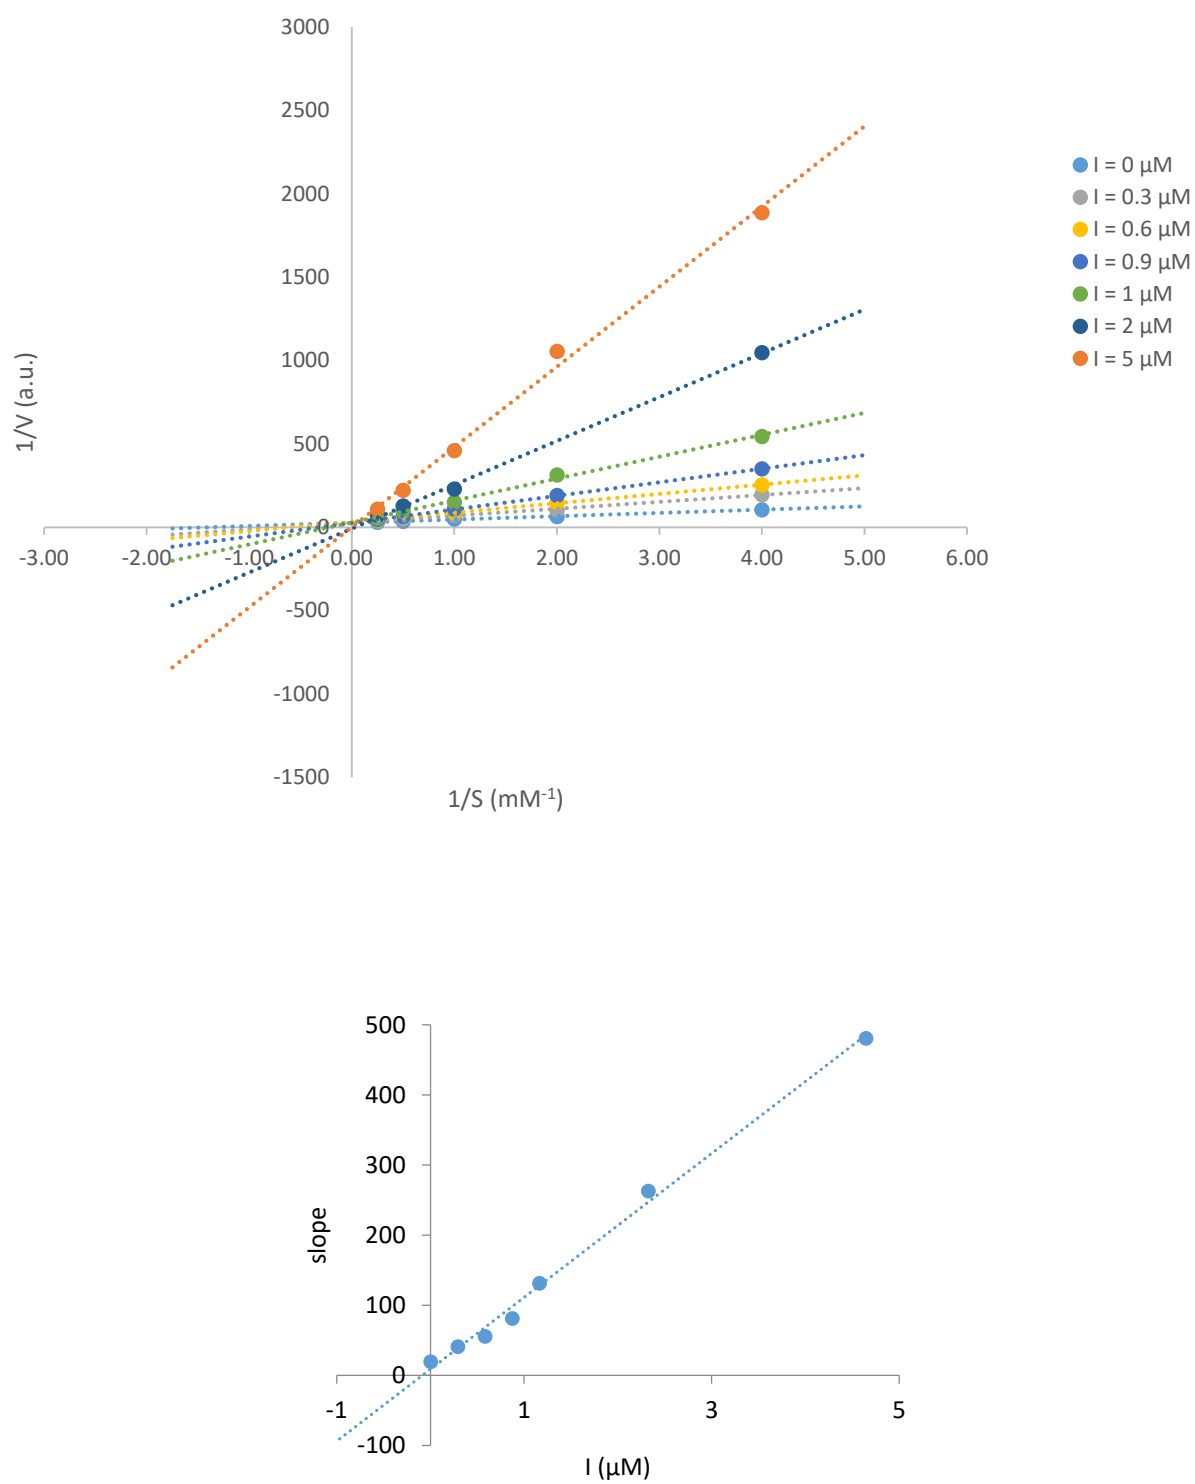

**Figure S37.** Lineweaver-Burk plots and replot of the slope versus inhibitor concentration for  $K_i$  determination of compound AuGNP **5** against JB $\alpha$ -man.  
 $K_i = 0.084 \pm 0.066 \mu\text{M}$ .
